# Supplementary material for: ICDP Oman Drilling Project: varitextured gabbros from the dike–gabbro transition within drill core GT3A
Source: Copernicus journal article supplement (doi:10.5194/ejm-34-603-2022), 2022-12-12
Supplement: Supplementary file 2 [file ejm-34-603-2022-supplement.zip]

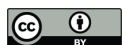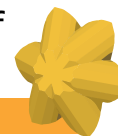

*Supplement of*

**ICDP Oman Drilling Project: varitextured gabbros from the dike–gabbro transition within drill core GT3A**

**Artur Engelhardt et al.**

*Correspondence to:* Artur Engelhardt ([a.engelhardt@mineralogie.uni-hannover.de](mailto:a.engelhardt@mineralogie.uni-hannover.de))

- [ejm-34-603-2022-supplement-title-page.pdf](#)
- [Fig S1.pdf](#)
- [Table S1.xlsx](#)
- [Table S2.xlsx](#)
- [Table S3.xlsx](#)

The copyright of individual parts of the supplement might differ from the article licence.
