# Supplementary figures and images for: ICDP Oman Drilling Project: varitextured gabbros from the dike–gabbro transition within drill core GT3A
Source: Copernicus journal article supplement (doi:10.5194/ejm-34-603-2022), 2022-12-12

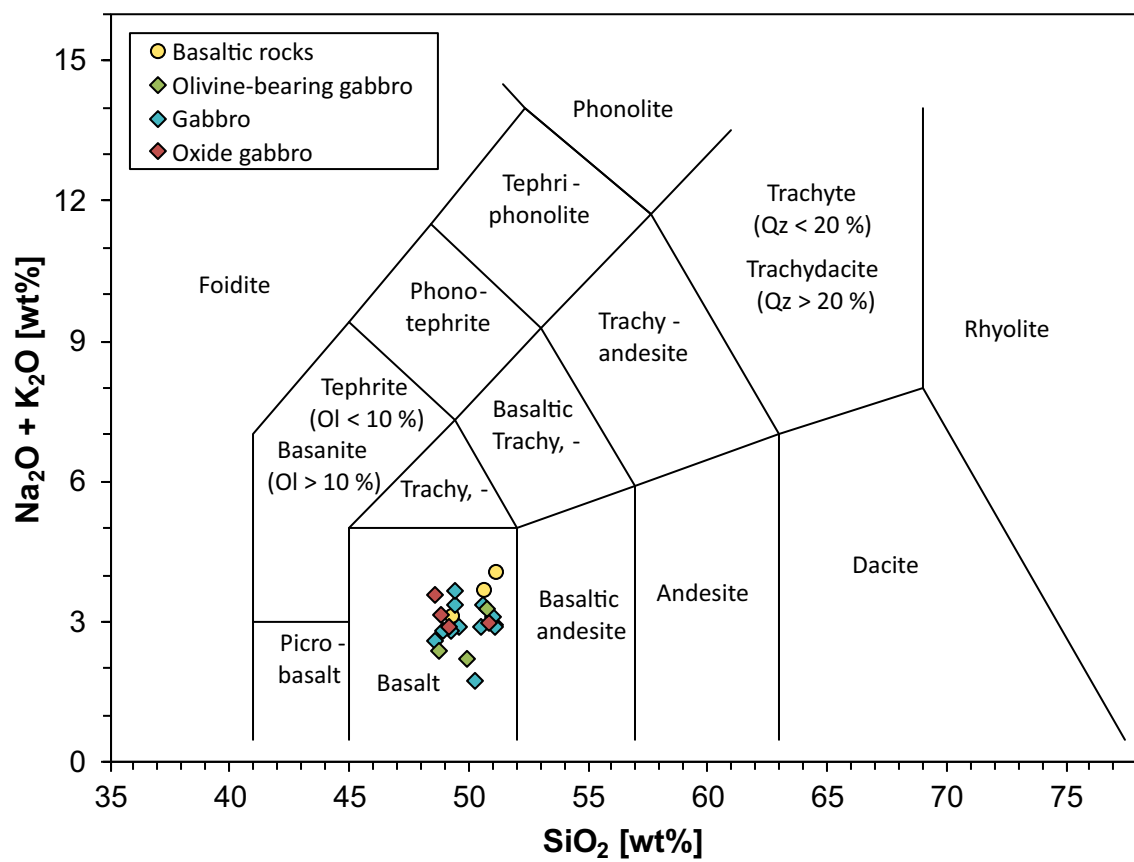

Figure S1

Supplement: Supplementary file 1 [file ejm-34-603-2022-supplement.zip]
